# Supplementary material for: Fabrication of thermally stable and active bimetallic Au–Ag nanoparticles stabilized on inner wall of mesoporous silica shell
Source: Royal Society of Chemistry journal article supplement (doi:10.1039/c3dt51546j), 2013-01-01
Supplement: c3dt51546j.pdf [file c3dt51546j.pdf]

## Supporting information

# Fabrication of Thermally Stable and Active Bimetallic Au-Ag Nanoparticles Stabilized on Inner Wall of Mesoporous Silica Shell

Yu Chen<sup>a,b</sup>, Qihua Wang<sup>\*a</sup>, Tingmei Wang<sup>a</sup>

<sup>a</sup> State Key Laboratory of Solid Lubrication, Lanzhou Institute of Chemical Physics, Chinese Academy of Science, Lanzhou 730000, China.

<sup>b</sup> Graduate University of the Chinese Academy of Sciences, Beijing, 100049

\*E-mail [wangqh@licp.cas.cn](mailto:wangqh@licp.cas.cn)

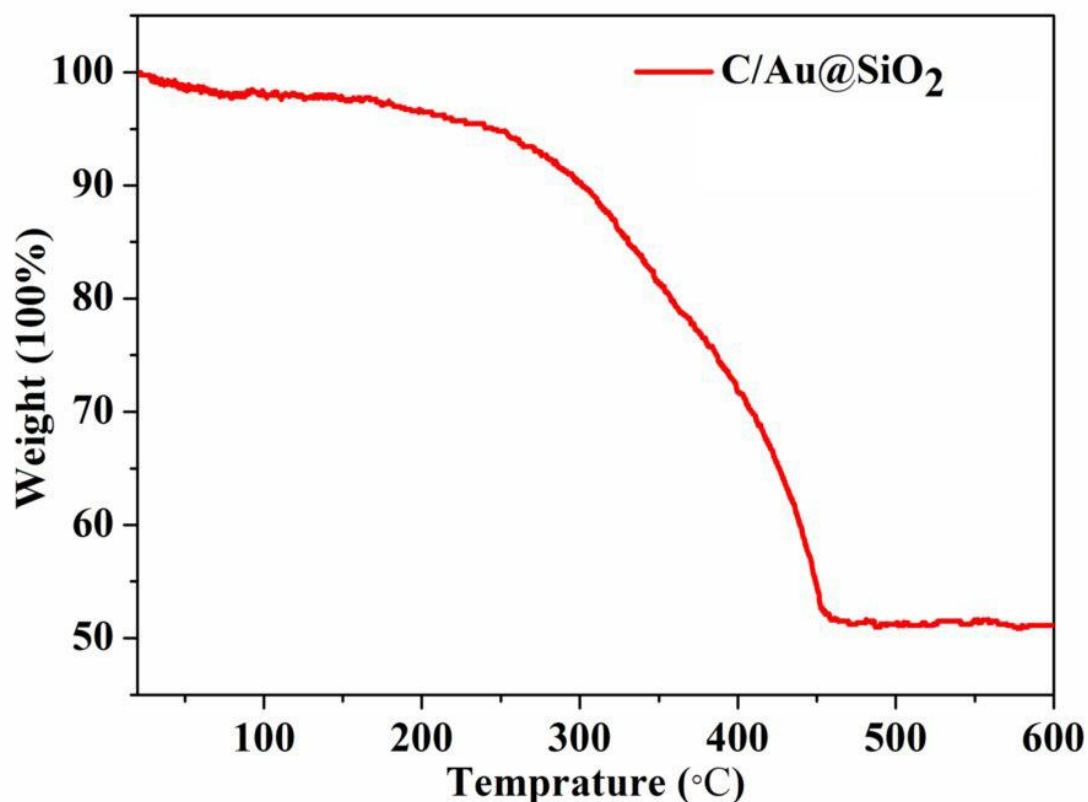

Figure S1 The TEM of Au-Ag@SiO<sub>2</sub> after the reduction treatment by H<sub>2</sub>.

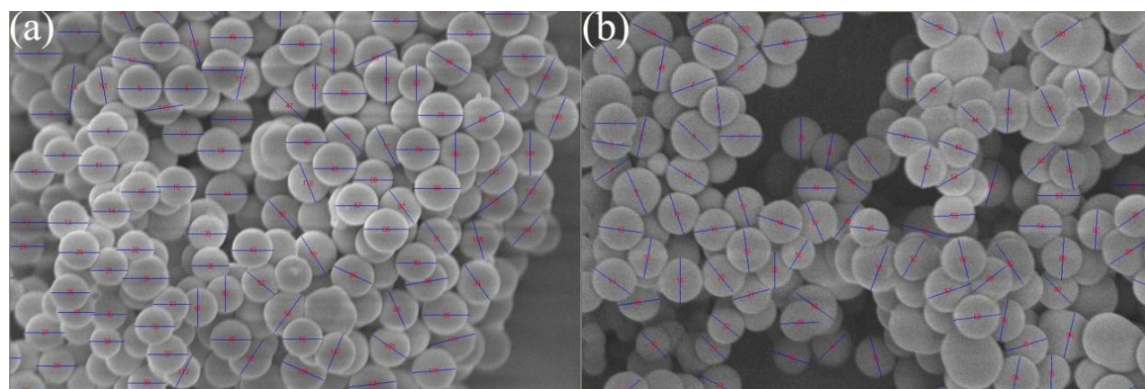

**Figure S2.** Calculating the mean diameters of (Au-Ag)/C@ SiO<sub>2</sub> composite microspheres (a) and (Au-Ag)@mSiO<sub>2</sub> composite microspheres (b), by measuring at least 100 particles.
